# Supplementary material for: Reduced microbial respiration sensitivity to soil moisture following long-term N fertilization enhances soil C retention in a boreal Scots pine forest
Source: Copernicus journal article supplement (doi:10.5194/egusphere-2024-3813), 2024-12-17
Supplement: Supplementary file 1 [file egusphere-2024-3813-supplement.pdf]

## SUPPLEMENTARY MATERIAL:

# Reduced microbial respiration sensitivity to soil moisture following long-term N fertilization enhances soil C retention in a boreal Scots pine forest

5

Boris Āupek<sup>1</sup>, Aleksu Lehtonen<sup>1</sup>, Stefano Manzoni<sup>2</sup>, Elisa Bruni<sup>3</sup>, Petr Baldrian<sup>4</sup>, Etienne Richy<sup>4</sup>, Bartosz Adamczyk<sup>1</sup>, Bertrand Guenet<sup>3</sup>, and Raisa Mäkipää<sup>1</sup>

<sup>1</sup>Natural Resources Institute Finland (LUKE), Helsinki, 00790, Finland

10 <sup>2</sup>Department of Physical Geography and Bolin Centre for Climate Research, Stockholm University, Stockholm, 10691, Sweden.

<sup>3</sup>Laboratoire de Géologie, École Normale Supérieure (ENS), Paris, 75005, France

<sup>4</sup>Laboratory of Environmental Microbiology, Institute of Microbiology of the Czech Academy of Sciences, Prague, 14200, Czech Republic

*Correspondence to:* Boris Āupek ([boris.tupek@luke.fi](mailto:boris.tupek@luke.fi))

15

**Table S1. Goodness of fit statistics of NLS models based on  $R_{h/SOC}(T)$  (Eq. 1), and  $R_{h/SOC}(T, SWC)$  (Eq. 2) after 10-fold cross validation: the root mean square error (RMSE), the mean absolute error (MAE), and their standard deviation (SD). All values are in  $\mu\text{g C g}^{-1} \text{SOC h}^{-1}$ .**

| Treatment | Models | RMSE                                     | RMSESD | MAE                                      | MAESD |
|-----------|--------|------------------------------------------|--------|------------------------------------------|-------|
|           |        | $\mu\text{g C g}^{-1} \text{SOC h}^{-1}$ |        | $\mu\text{g C g}^{-1} \text{SOC h}^{-1}$ |       |
| CTR       | T      | 17.20                                    | 2.82   | 13.42                                    | 2.09  |
|           | T, SWC | 15.53                                    | 2.28   | 11.53                                    | 1.42  |
| N+        | T      | 12.99                                    | 2.80   | 9.00                                     | 1.77  |
|           | T, SWC | 13.04                                    | 2.37   | 9.02                                     | 1.18  |

20

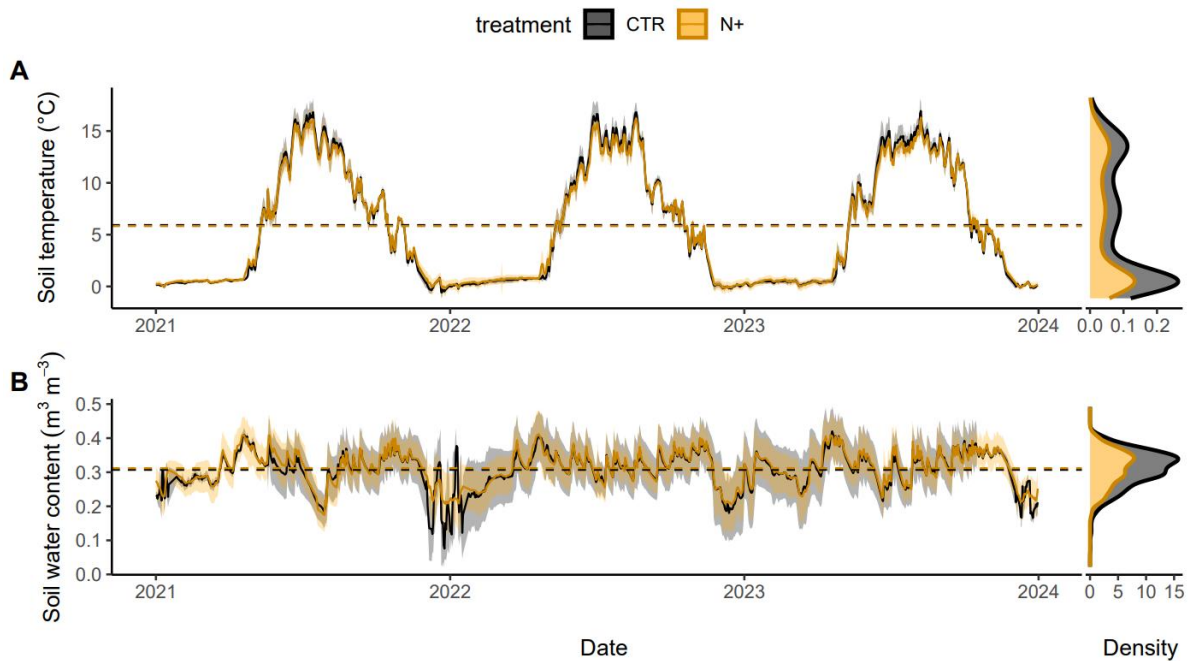

25 **Figure S1.** The daily mean timeseries and their density plots of **A** soil temperature at 5 cm depth (°C) and **B** soil volumetric water content at 5 cm depth (m<sup>3</sup> m<sup>-3</sup>) for control (CTR) and N fertilized (N+) plots during the period from Jan 2021 to Dec 2023. The full line shows the daily mean, the ribbon is the SE of plots, and the dashed line is the mean over the whole period.

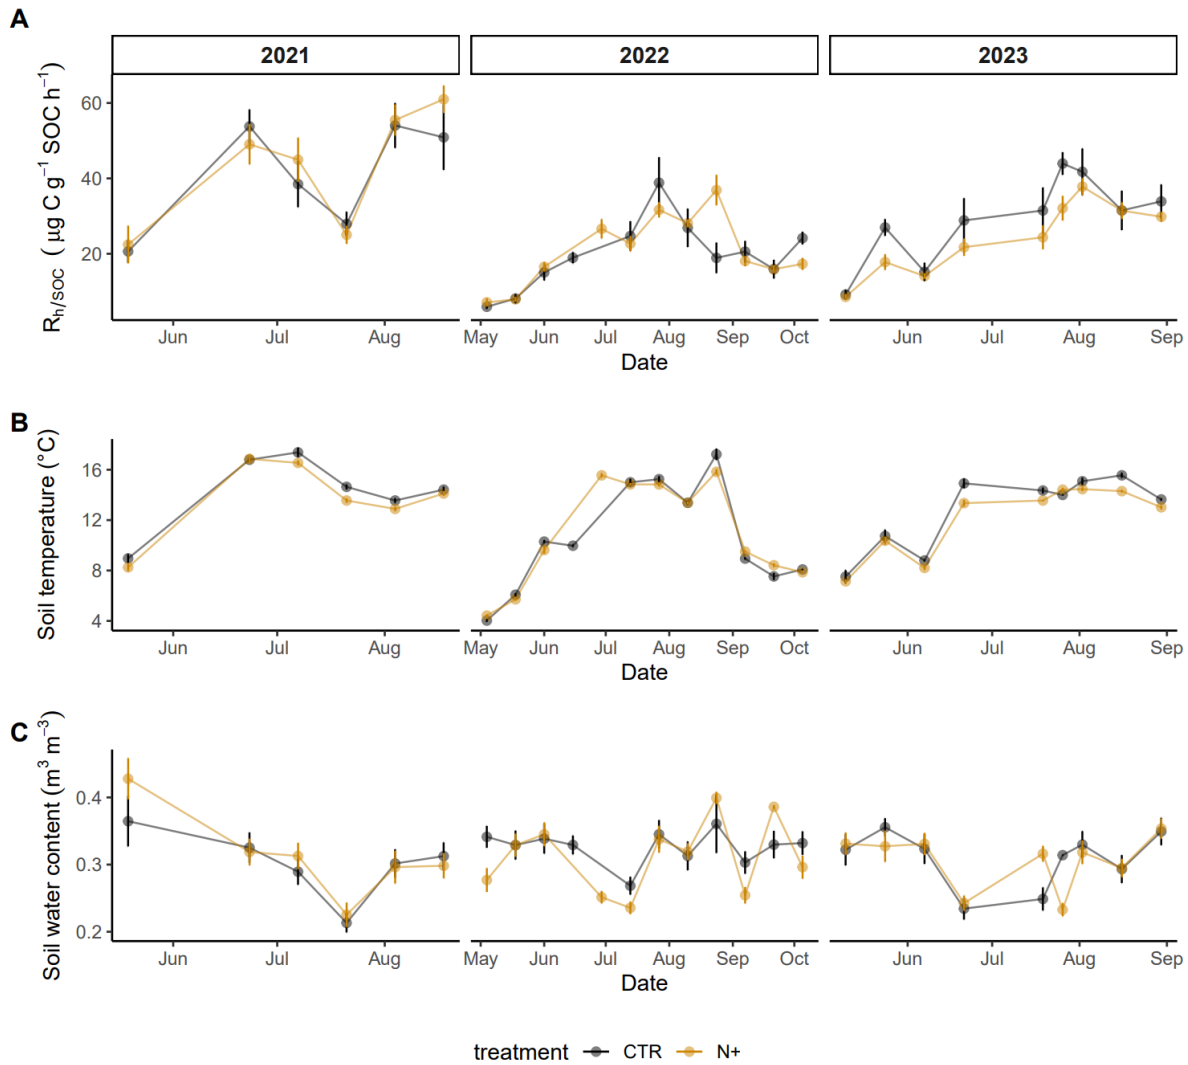

**Figure S2.** The weekly mean measured timeseries of **A** soil microbial respiration normalized by SOC ( $R_{n/SOC}$ ,  $\mu\text{g C g}^{-1} \text{SOC h}^{-1}$ ), **B** soil temperature at 5 cm depth ( $^{\circ}\text{C}$ ) and **C** soil volumetric water content at 5 cm depth ( $\text{m}^3 \text{m}^{-3}$ ) for control (CTR) and N fertilized (N+) plots during the period from May 2021 to September 2023. The error bars show the SE of the mean of plots.
